# Supplementary material for: A Mutation in the FHA Domain of Coprinus cinereus Nbs1 Leads to Spo11-Independent Meiotic Recombination and Chromosome Segregation
Source: PubMed Central journal article supplement (PMC3815056; doi:10.1534/g3.113.007906), 2013-11-01
Supplement: supp_g3.113.007906_007906SI.pdf [file supp_g3.113.007906_007906SI.pdf]

**A mutation in the FHA domain of *Coprinus cinereus* Nbs1 leads to Spo11-independent meiotic recombination and chromosome segregation**

K. Nicole Crown<sup>\*1</sup>, Oleksandr P. Savytskyy<sup>\*</sup>, Shehre-Banoo Malik<sup>\*\*</sup>, John Logsdon<sup>\*\*</sup>, R. Scott Williams<sup>§</sup>, John A. Tainer<sup>§§</sup>, Miriam E. Zolan<sup>\*</sup>

<sup>\*</sup>Department of Biology, Indiana University, Bloomington, Indiana 47405

<sup>\*\*</sup>Department of Biology, University of Iowa, Iowa City, Iowa 52242

<sup>§</sup>National Institute of Environmental Health Sciences, Research Triangle Park, North Carolina 27709

<sup>§§</sup>The Scripps Research Institute, La Jolla, California 92037

<sup>1</sup>Current address: Department of Biology, University of North Carolina at Chapel Hill, Chapel Hill, NC 27599

**DOI: 10.1534/g3.113.007906**

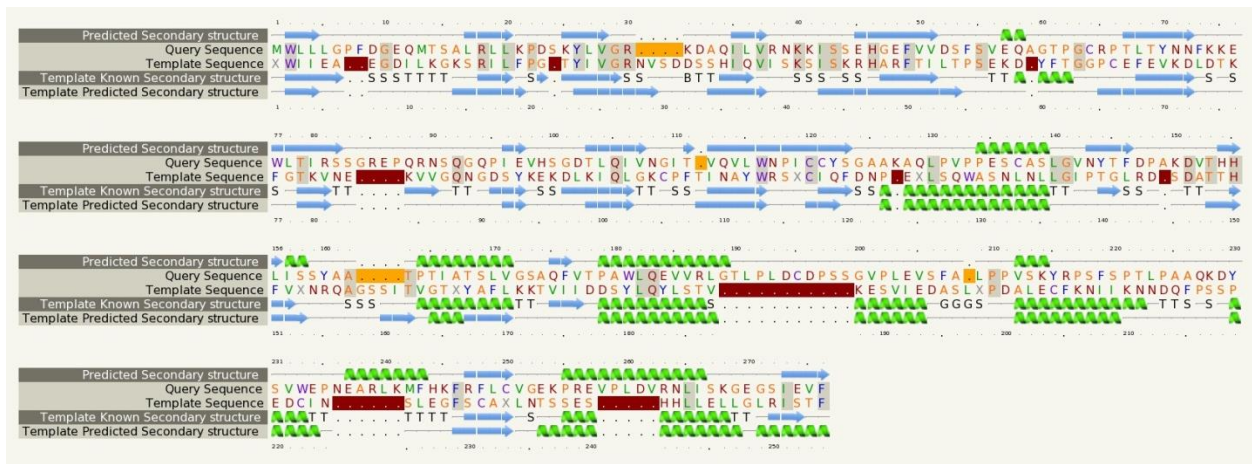

**Figure S1** PHYRE2 alignment of *C. cinereus* Nbs1 and *S. pombe* Nbs1 (Kelley and Sternberg 2009). The query sequence is *C. cinereus* Nbs1 and the template sequence is *S. pombe* Nbs1. Predicted secondary structures are made by the PHYRE2 program, and the *S. pombe* known secondary structure is from the crystal structure (Williams et al. 2009). Blue arrows represent beta sheets and green spirals represent alpha helices. Amino acids highlighted in red represent insertions in the *C. cinereus* protein sequence relative to *S. pombe* and those highlighted in yellow represent deletions in the *C. cinereus* protein sequence relative to *S. pombe*. Amino acids 1-115 of *C. cinereus* Nbs1 correspond to the FHA domain of *S. pombe* Nbs1.



```

Coprinus  GKKREDEFDREFNRLKISKPDLDQNGREPEEDWKVLADFGDDSGIRGNFMTICELEVFK  749
          GKKRE + D ++ +IS D                      DDS + + + E
Human     GKKRELKEDSLWSAKEISNND-----KLQDDSEMLPKKLLLTEFRSLV  663

Coprinus  EKNGRNAKSAGEMRPEWEGKPNFKKFKRKNVPRSG  784
          KN + +G + ++   NFKKFK+  P +G
Human     IKNSTSRNPSG-INDDYGQLKNFKKFKKVTYPGAG  697

```

**Figure S3** Alignment of the Mre11 binding motif (amino acids 770-776) and surrounding sequence from *C. cinereus* and human Nbs1. The *C. cinereus* protein sequence was used as a query in a BLAST against the human protein sequence to produce an alignment.

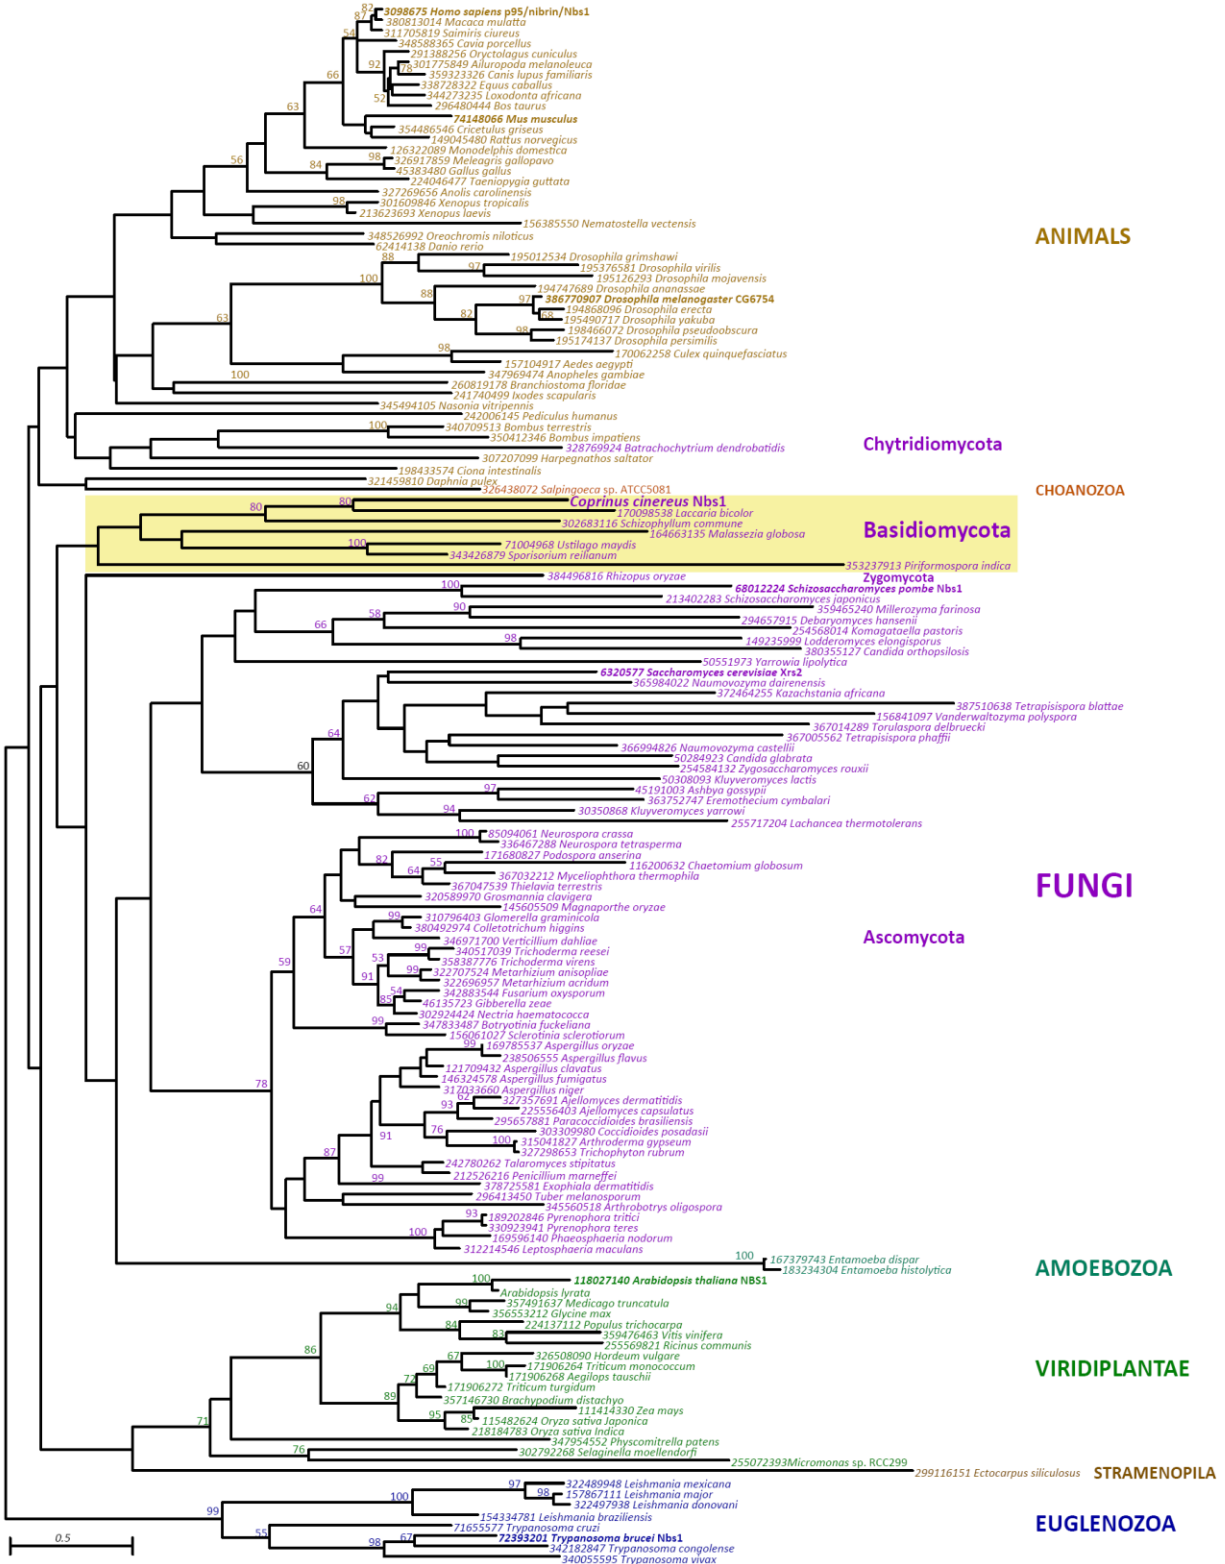

**Figure S4** Phylogenetic tree showing the evolutionary relationships among eukaryotic orthologs of *nbs1* from animals, fungi, plants and protists. *C. cinereus* Nbs1 groups with its closest relative *Laccaria* and other Basidiomycete fungi. Branch support is indicated by numbers at the base of branches, the percent bootstrap support  $\geq 50\%$ . The scale bar represents the distance of 0.5 amino acid substitutions per site. 186 aligned amino acid sites were analyzed using the LG+25 $\gamma$  substitution model implemented in RAxML version 7.3.1, resulting in this tree with an optimized LnL=-41564.91. The parameter describing the  $\gamma$ -distributed amino acid substitution frequencies is  $\alpha=1.58$ . The GenInfo Identifier numbers for each sequence from Genbank are indicated.

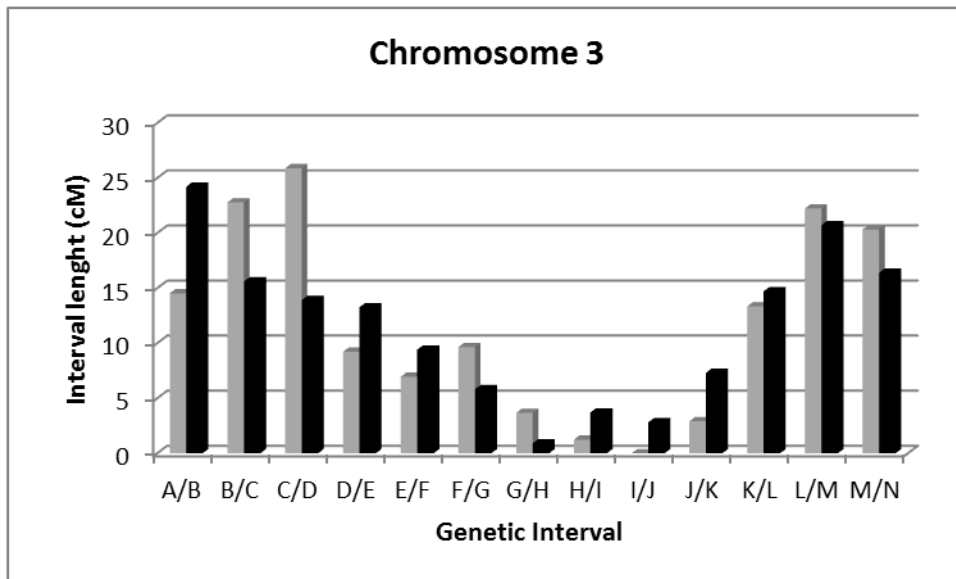

**Figure S5** Map lengths of individual intervals along chromosome 3 from the homozygous and heterozygous nbs1-2 crosses. Grey bars are the homokaryon nbs1-2 cross and black bars are the heterokaryon wild type x nbs1-2 cross. No interval is statistically significantly different, nor is the total map lengths.

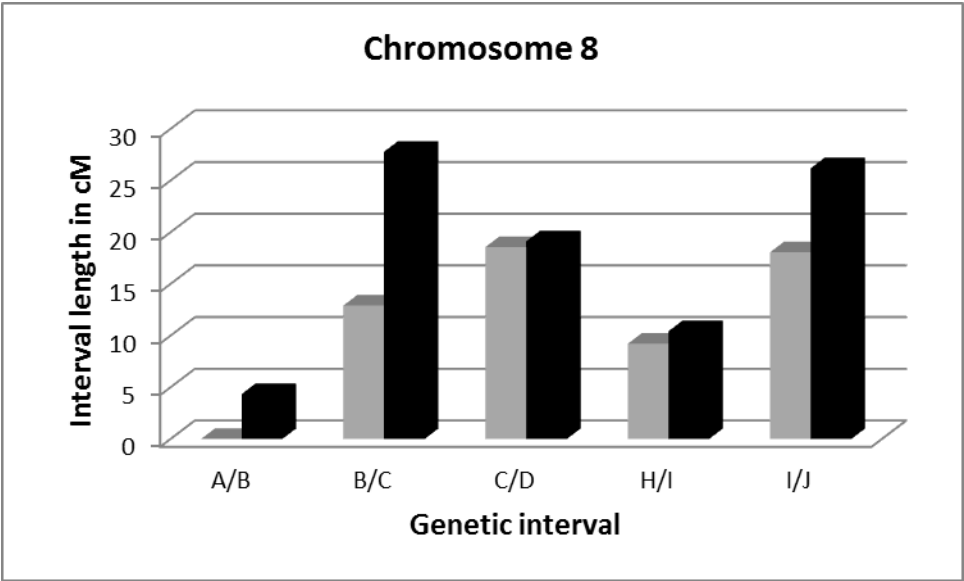

**Figure S6** Map lengths of individual hotspot intervals on chromosome 8. Light grey bars are the homokaryon nbs1-2 cross and black bars are the heterokaryon wild type x nbs1-2 cross. Total map lengths are not statistically significantly different.



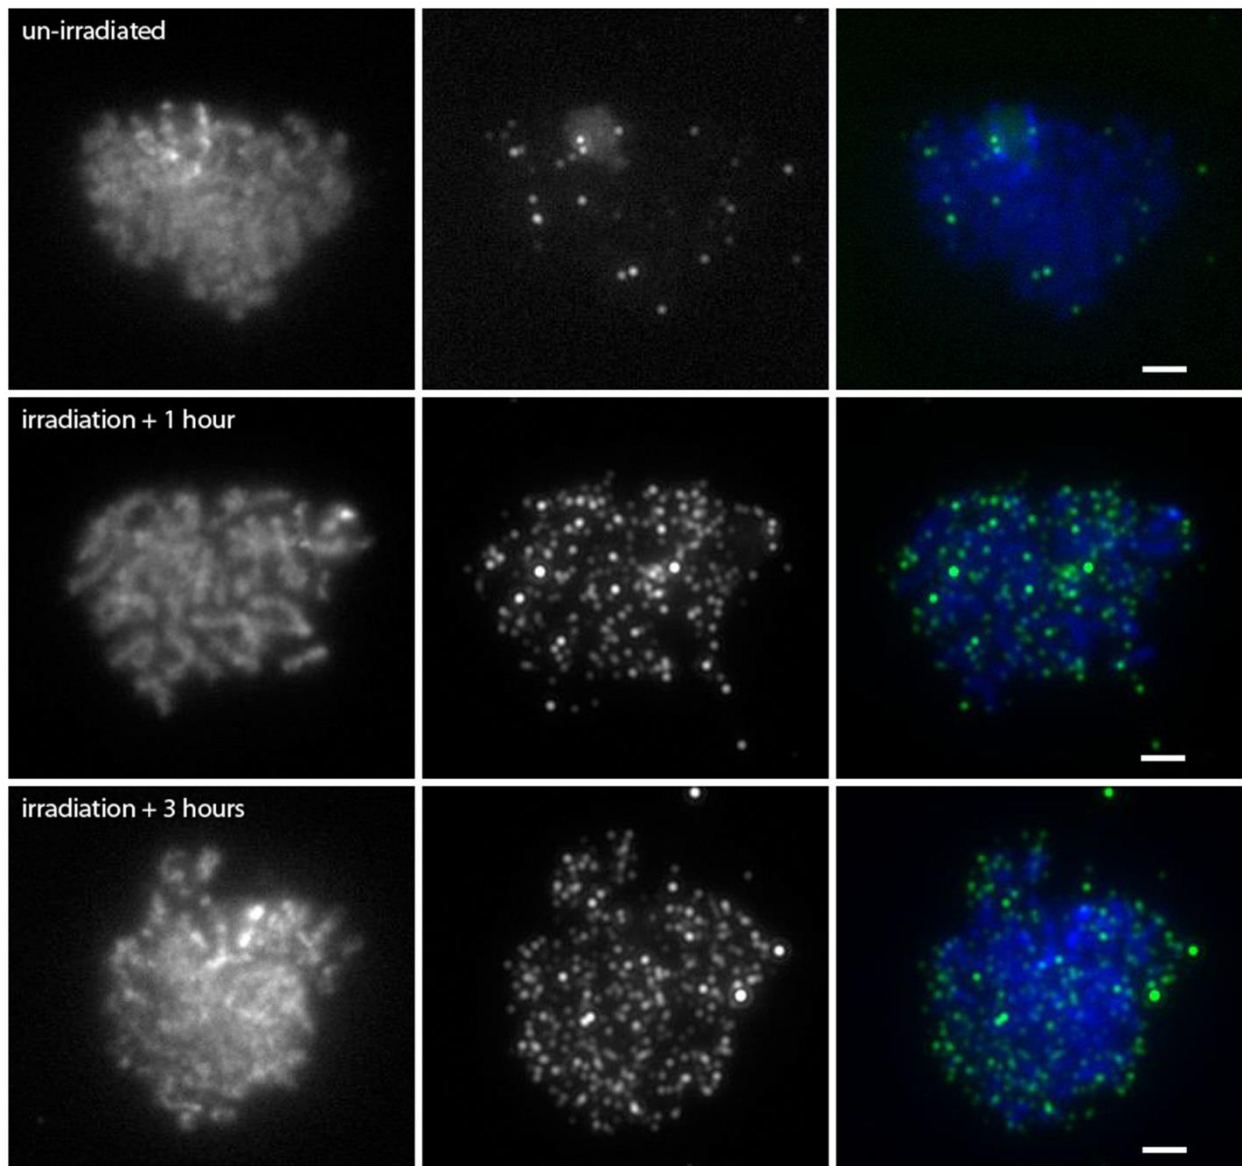

**Figure S7** anti-gamma-H2AX localization on *spo11-1* meiotic chromosome spreads from unirradiated mushrooms at 2 hours past karyogamy (n=31), and one hour (n=32) and three hours (n=32) after irradiation with 60 krad. Images in the left hand column are DAPI stained chromosome spreads, images in the middle column are anti-gamma-H2AX counter-stained with a TRITC conjugated secondary antibody and images in the right hand column are the color combined images. Scale bars represent 2  $\mu$ m.

**Table S1 Primer sequences used to amplify *C. cinereus nbs1***

| Primer name      | Primer sequence       |
|------------------|-----------------------|
| UTR5             | TGTTGGGCCCGTTCGACGG   |
| Nbs1Forward56    | AAGATGCCCAAATCCTTG TG |
| Nbs1Forward425   | ACGTTTGACCCAGCTAAGGA  |
| Nbs1Forward619   | GCCTCCTGTCAGCAAGTACC  |
| Nbs1Forward809   | ATTCGGGTGTGACCAAATTC  |
| Nbs1Forward1179  | CCCTCCTATCAAGGTGTGGA  |
| Nbs1Forward 1563 | CTTTGACGATGGGTTCCATT  |
| Nbs1Forward1773  | TGAGACGAACAGGGTTGTGA  |
| Nbs1Forward2100  | AGATGATTCGGGGATTAGGG  |
| Nbs1Forward2241  | AAAAATGTCCCGAGAAGTGG  |
| Nbs1Forward3159  | CAAGGCTGTTGCTTCGATTC  |
| Nbs1Reverse809   | GAATTTGGTCACACCCGAAT  |
| Nbs1Reverse1517  | GACGAGTCTGCTGGTGGTTC  |
| Nbs1Reverse1843  | TCGAGACAGTTGCAGTGGAC  |
| Nbs1Reverse2040  | TCGGGTTTGAAATCTTGAG   |
| Nbs1Reverse2833  | TTCTCGCCCTAGTCCTCGTA  |

**Table S2 Primers used to amplify simple sequence repeats on chromosomes 3 and 8**

| SSR     | Forward Primer (with M13 tail)         | Reverse Primer        |
|---------|----------------------------------------|-----------------------|
| tssr53  | TGTA AACGACGGCCAGTTGCCGGCGTTGTAAGTTT   | AGAACTCGAATGGTTCAACG  |
| tssr63  | TGTA AACGACGGCCAGTTTCGCTCTTCCAACAACAA  | TGGGACTTTGCAACCTATCC  |
| tssr64  | TGTA AACGACGGCCAGTCTTCCACTTCCGTTTCCTCA | TCCCTATGTCGGATGACGAT  |
| tssr65  | TGTA AACGACGGCCAGTCAATCGTAAACGCAAACGAA | GAGAGGAAGAGGAGGGAGGA  |
| tssr70  | TGTA AACGACGGCCAGTGCGGCCAGACATAACAGAAT | CGATGCCCTTCTGATCTCTT  |
| tssr73  | TGTA AACGACGGCCAGTGAGAAGGTCCACCGGTTTG  | GATCACGTGCGGTCAATG    |
| tssr74  | TGTA AACGACGGCCAGTGGAGAGTATCGAGGCGGATG | AGCAATAGCATCGTCAATCG  |
| tssr77  | TGTA AACGACGGCCAGTGCAGCGTCACTCACCCTT   | GCACTCTCCTGCTCAAAC    |
| tssr78  | TGTA AACGACGGCCAGTCTTCAGTCGCGCAAGTTTC  | ATATTGGCTTCGGACAATGC  |
| tssr89  | TGTA AACGACGGCCAGTAAATACCCGGTCCATGATGA | CAATTGGGGAGGGTGTAAG   |
| tssr93  | TGTA AACGACGGCCAGTTGGGAGGAAGCCATAACTGT | GGGTTGTTGTTTTGGGTGT   |
| tssr98  | TGTA AACGACGGCCAGTAAACAACGACAACCCGTCTG | GCCTAATACCGACGACGACA  |
| tssr108 | TGTA AACGACGGCCAGTGAACGACACCTCCACTCCTC | TGTGTGTTTGTCTCGTCGAA  |
| tssr286 | TGTA AACGACGGCCAGTTACCACCCTGTTGACGTTGA | TGGTACACCCGTTGAAGGA   |
| tssr287 | TGTA AACGACGGCCAGTCTACACCAGTCGAACCGTCA | CATGGTTCACCACAGATTC   |
| tssr292 | TGTA AACGACGGCCAGTTACATCACGGTGGTCTTGGA | ATCGCGACAGCTGTTTATGA  |
| tssr295 | TGTA AACGACGGCCAGTCTCGCTGCCAATACCTCTTC | TGCTCCCGAACATCTTCTC   |
| tssr298 | TGTA AACGACGGCCAGTCGAGTCTTGGGCGTCATAGT | TGGACTCGGAAACGAGCTTA  |
| tssr500 | TGTA AACGACGGCCAGTGCTTTTGGTGCAGGCTATGA | GGGTTCTCCCCACTTCTAC   |
| tssr502 | TGTA AACGACGGCCAGTCTTACCCGATTTCCTAGCC  | GACGTGGTAGAAGCAGTGTCC |

**Table S3** Size of parental alleles used for genotyping.

| ssr | 172    | J6;5-4 | nbs1-2<br>(172) | nbs1-<br>2;5-3 |
|-----|--------|--------|-----------------|----------------|
| 53  | 220.19 | 221.11 | 220.37          | 223.03         |
| 63  | 211.97 | 214.81 | 211.87          | 212.34         |
| 65  | 220.73 | 214.94 | 220.77          | 221.46         |
| 70  | 213.23 | 217.5  | 213.66          | 217.36         |
| 73  | 215.6  | 218    | 216.11          | 218.86         |
| 74  | 216.11 | 219.42 | 216.85          | 214.15         |
| 77  | 229.47 | 214    | 229.95          | 214.63         |
| 78  | 211.69 | 214    | 211.73          | 214.79         |
| 89  | 194.13 | 218    | 194.51          | 218.61         |
| 93  | 207.1  | 215.09 | 207.74          | 215.3          |
| 98  | 208.84 | 214.69 | 208.62          | 214.95         |
| 108 | 200.43 | 218    | 200.43          | 219.24         |
| 286 | 306.84 | 317.57 | 307.19          | 312.52         |
| 287 | 295.54 | 313.83 | 296.23          | 313.89         |
| 292 | 307.81 | n/a    | 307.68          | 315.24         |
| 295 | 311.27 | 309.26 | 312.06          | 309.11         |
| 298 | 299.68 | 318.64 | 299.68          | 318.67         |
| 500 | 273.96 | 270.75 | 273.81          | 270.38         |
| 502 | 271.22 | 267.79 | 271             | 267.11         |

**Table S4 Primers used to amplify single nucleotide polymorphisms on chromosomes 3 and 8.**

| SNP name  | Forward primer sequence               | Reverse Primer sequence |
|-----------|---------------------------------------|-------------------------|
| SNP .065M | TGTA AACGACGGCCAGTAACCTTGCTTGTGGGCTA  | TGTGTGCTTGAGTTTGAATG    |
| SNP .1M   | GGTATCCGAGGGTTGAGAGG                  | CACTACCACCAGCACTACCG    |
| SNP .3M   | AGAGGCTTACTGACGCTTCG                  | TAATTCGCTCAAGGCATGTG    |
| SNP .5M   | GGACAAAGGACCAGGAATGA                  | CTTTCGGCTTTCAGTTCGAC    |
| SNP .8M   | GGCGAAGAATAAGCGTCAAG                  | ACCGCAAACCTCAACCTATGG   |
| SNP .153  | GTCTACACGGGTCTCTGGA                   | GAACGCAGTAATCGTGCTCA    |
| SNP .205  | CCGTCTCTGAAGAGCCTTTG                  | ATAACAAGCAGGGCGATGAC    |
| SNP 2.28  | TGTA AACGACGGCCAGTTTGTCCCCAGAGCTGACTT | ACGTGCCAATGGATGGTAAG    |

**Table S5 Single nucleotide polymorphisms used for genetic mapping**

| SNP name  | location on chromosome | sequence in J6;5-4 and nbs1-2;5-3     | sequence in 172 and nbs1-2 (172)      |
|-----------|------------------------|---------------------------------------|---------------------------------------|
| SNP .065M | 65309                  | AGG-----TCG                           | AGGC <b>C</b> GAATCG                  |
| SNP .1M   | 99606                  | CC <b>G</b> CCTTCG                    | CC---TTCG                             |
| SNP .3M   | 299500                 | GTCCAGC                               | GTCAAGC                               |
| SNP .5M   | 553545                 | GAAATTCTGGAGTC                        | GAAATT-CTGGAGTC                       |
| SNP .8M   | 798676                 | CATCGTT-----TCATTCAC                  | CATCATT <b>CCCG</b> CTTCATTCAC        |
| SNP .153  | 153710                 | PCR fragment size 1000 bp             | PCR fragment size 1300 bp             |
| SNP .205  | 205249                 | GCCTGGGTTTATTTATGG <b>AC</b> GCTAACCG | GCATGGGTTTATTTATGC <b>AG</b> ACTAAACG |
| SNP 2.28  | 2280834                | AGA--AC---GGA                         | AGAG <b>A</b> ACTTGGA                 |

**Table S6 Interference on chromosome 3**

| Genetic interval | Wild type | <i>nbs1-2</i> |
|------------------|-----------|---------------|
| A/B/C            | 0         | 0             |
| B/C/D            | 0         | 3.33*         |
| C/D/E            | 0         | 0             |
| D/E/F            | 0         | 2.32          |
| E/F/G            | 0         | 2.56          |
| F/G/H            | 16.23     | 0             |
| G/H/I            | 0         | 0             |
| H/I/J            | 0         | 0             |
| I/J/K            | 0         | 0             |
| J/K/L            | 0         | 0             |
| K/L/M            | 0         | 0.67          |
| L/M/N            | 0         | 0             |

\*statistically significant,  $p < 0.05$

Interference was calculated as in Malkova et al (2004). Zero indicates complete interference, numbers greater than 1 indicate negative interference, and numbers between zero and one indicate loss of positive interference.

**Table S7 Interference among chromosome 8 hotspots**

| Genetic interval | Wild type | <i>nbs1-2</i> |
|------------------|-----------|---------------|
| A/B/C            | 1.4       | 0             |
| B/C/D            | 0         | 0.75          |
| H/I/J            | 0         | 3.57          |
