# Supplementary material for: A Mutation in the FHA Domain of Coprinus cinereus Nbs1 Leads to Spo11-Independent Meiotic Recombination and Chromosome Segregation
Source: PubMed Central journal article supplement (PMC3815056; doi:10.1534/g3.113.007906), 2013-11-01
Supplement: supp_g3.113.007906_FigureS3.pdf [file supp_g3.113.007906_FigureS3.pdf]

```

Coprinus  GKKREDEFDREFNRLKISKPDLDQNGREPEEDWKVLADFGDDSGIRGNFMTICELEVFK  749
          GKKRE + D ++ +IS D                      DDS + + + E
Human     GKKRELKEDSLWSAKEISNND-----KLQDDSEMLPKKLLLTEFRSLV  663

Coprinus  EKNGRNAKSAGEMRPEWEGKPNFKKFKRKNVPRSG  784
          KN + +G + ++ NFKKFK+ P +G
Human     IKNSTSRNPSG-INDDYGQLKNFKKFKKVTYPGAG  697

```

**Figure S3** Alignment of the Mre11 binding motif (amino acids 770-776) and surrounding sequence from *C. cinereus* and human Nbs1. The *C. cinereus* protein sequence was used as a query in a BLAST against the human protein sequence to produce an alignment.
