# Supplementary material for: A Mutation in the FHA Domain of Coprinus cinereus Nbs1 Leads to Spo11-Independent Meiotic Recombination and Chromosome Segregation
Source: PubMed Central journal article supplement (PMC3815056; doi:10.1534/g3.113.007906), 2013-11-01
Supplement: supp_g3.113.007906_FigureS5.pdf [file supp_g3.113.007906_FigureS5.pdf]

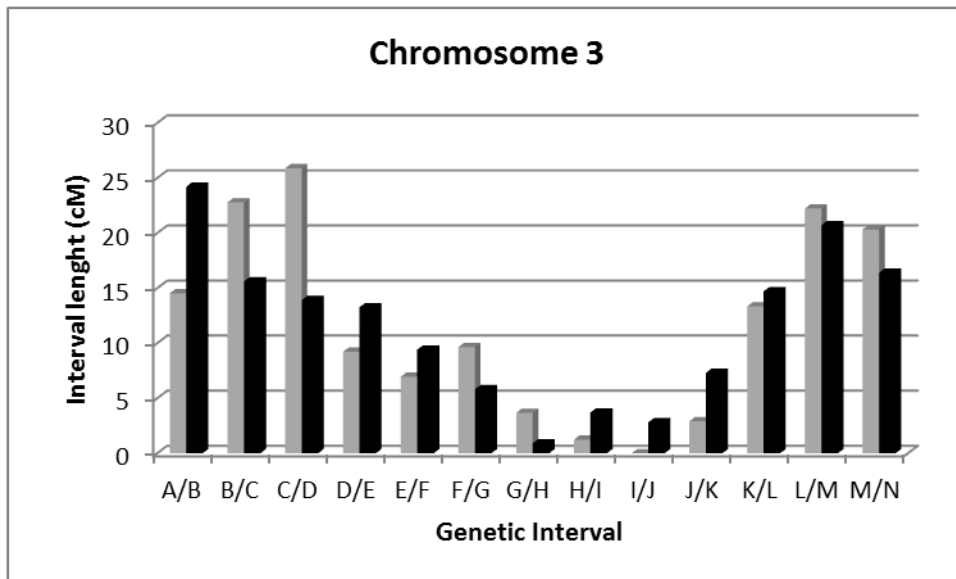

**Figure S5** Map lengths of individual intervals along chromosome 3 from the homozygous and heterozygous nbs1-2 crosses. Grey bars are the homokaryon nbs1-2 cross and black bars are the heterokaryon wild type x nbs1-2 cross. No interval is statistically significantly different, nor is the total map lengths.
