# Supplementary material for: A Mutation in the FHA Domain of Coprinus cinereus Nbs1 Leads to Spo11-Independent Meiotic Recombination and Chromosome Segregation
Source: PubMed Central journal article supplement (PMC3815056; doi:10.1534/g3.113.007906), 2013-11-01
Supplement: supp_g3.113.007906_TableS2.pdf [file supp_g3.113.007906_TableS2.pdf]

**Table S2 Primers used to amplify simple sequence repeats on chromosomes 3 and 8**

| SSR     | Forward Primer (with M13 tail)         | Reverse Primer        |
|---------|----------------------------------------|-----------------------|
| tssr53  | TGTA AACGACGGCCAGTTGCCGGCGTTGTAAGTTTTA | AGAACTCGAATGGTTCAACG  |
| tssr63  | TGTA AACGACGGCCAGTTTCGCTCTTCCAACAACAA  | TGGGACTTTGCAACCTATCC  |
| tssr64  | TGTA AACGACGGCCAGTCTTCCACTTCCGTTTCCTCA | TCCCTATGTCGGATGACGAT  |
| tssr65  | TGTA AACGACGGCCAGTCAATCGTAAACGCAAACGAA | GAGAGGAAGAGGAGGGAGGA  |
| tssr70  | TGTA AACGACGGCCAGTGCGGCCAGACATAACAGAAT | CGATGCCCTTCTGATCTCTT  |
| tssr73  | TGTA AACGACGGCCAGTGAGAAGGTCCACCGGTTTG  | GATCACGTGCGGTCAATG    |
| tssr74  | TGTA AACGACGGCCAGTGGAGAGTATCGAGGCGGATG | AGCAATAGCATCGTCAATCG  |
| tssr77  | TGTA AACGACGGCCAGTGCAGCGTCACTCACCCTT   | GCACTCTCCTGCTCAAAC    |
| tssr78  | TGTA AACGACGGCCAGTCTTCAGTCGCGCAAGTTTC  | ATATTGGCTTCGGACAATGC  |
| tssr89  | TGTA AACGACGGCCAGTAAATACCCGGTCCATGATGA | CAATTGGGGAGGGTGTAAG   |
| tssr93  | TGTA AACGACGGCCAGTTGGGAGGAAGCCATAACTGT | GGGTGTTGTTTTGGGTGT    |
| tssr98  | TGTA AACGACGGCCAGTAAACAACGACAACCCGTCTG | GCCTAATACCGACGACGACA  |
| tssr108 | TGTA AACGACGGCCAGTGAACGACACCTCCACTCCTC | TGTGTGTTTGTCTCGTCGAA  |
| tssr286 | TGTA AACGACGGCCAGTTACCACCCTGTTGACGTTGA | TGGTACACCCGTTGAAGGA   |
| tssr287 | TGTA AACGACGGCCAGTCTACACCAGTCGAACCGTCA | CATGGTTCACCACAGATTC   |
| tssr292 | TGTA AACGACGGCCAGTTACATCACGGTGGTCTTGGA | ATCGCGACAGCTGTTTATGA  |
| tssr295 | TGTA AACGACGGCCAGTCTCGCTGCCAATACCTCTTC | TGCTCCCGAACATCTTCTC   |
| tssr298 | TGTA AACGACGGCCAGTCGAGTCTTGGGCGTCATAGT | TGGACTCGGAAACGAGCTTA  |
| tssr500 | TGTA AACGACGGCCAGTGCTTTTGGTGCAGGCTATGA | GGGTTCCTCCCACTTCTAC   |
| tssr502 | TGTA AACGACGGCCAGTCTTACCCGATTTCCTAGCC  | GACGTGGTAGAAGCAGTGTCC |
