# Supplementary material for: A Mutation in the FHA Domain of Coprinus cinereus Nbs1 Leads to Spo11-Independent Meiotic Recombination and Chromosome Segregation
Source: PubMed Central journal article supplement (PMC3815056; doi:10.1534/g3.113.007906), 2013-11-01
Supplement: supp_g3.113.007906_TableS4.pdf [file supp_g3.113.007906_TableS4.pdf]

**Table S4 Primers used to amplify single nucleotide polymorphisms on chromosomes 3 and 8.**

| SNP name  | Forward primer sequence               | Reverse Primer sequence |
|-----------|---------------------------------------|-------------------------|
| SNP .065M | TGTA AACGACGGCCAGTAACCTTGCTTGTGGGCTA  | TGTGTGCTTGAGTTTGAATG    |
| SNP .1M   | GGTATCCGAGGGTTGAGAGG                  | CACTACCACCAGCACTACCG    |
| SNP .3M   | AGAGGCTTACTGACGCTTCG                  | TAATTCGCTCAAGGCATGTG    |
| SNP .5M   | GGACAAAGGACCAGGAATGA                  | CTTTCGGCTTTCAGTTCGAC    |
| SNP .8M   | GGCGAAGAATAAGCGTCAAG                  | ACCGCAAACCTCAACCTATGG   |
| SNP .153  | GTCTACACCGGGTCTCTGGA                  | GAACGCAGTAATCGTGCTCA    |
| SNP .205  | CCGTCTCTGAAGAGCCTTTG                  | ATAACAAGCAGGGCGATGAC    |
| SNP 2.28  | TGTA AACGACGGCCAGTTTGTCCCCAGAGCTGACTT | ACGTGCCAATGGATGGTAAG    |
