# Supplementary material for: A Mutation in the FHA Domain of Coprinus cinereus Nbs1 Leads to Spo11-Independent Meiotic Recombination and Chromosome Segregation
Source: PubMed Central journal article supplement (PMC3815056; doi:10.1534/g3.113.007906), 2013-11-01
Supplement: supp_g3.113.007906_TableS5.pdf [file supp_g3.113.007906_TableS5.pdf]

**Table S5 Single nucleotide polymorphisms used for genetic mapping**

| SNP name  | location on chromosome | sequence in J6;5-4 and nbs1-2;5-3     | sequence in 172 and nbs1-2 (172)      |
|-----------|------------------------|---------------------------------------|---------------------------------------|
| SNP .065M | 65309                  | AGG-----TCG                           | AGGC <b>C</b> GAATCG                  |
| SNP .1M   | 99606                  | CC <b>G</b> CCTTCG                    | CC---TTCG                             |
| SNP .3M   | 299500                 | GTCCAGC                               | GTCAAGC                               |
| SNP .5M   | 553545                 | GAAATTCTGGAGTC                        | GAAATT-CTGGAGTC                       |
| SNP .8M   | 798676                 | CATCGTT-----TCATTAC                   | CATCATT <b>CCCG</b> CTTCATTAC         |
| SNP .153  | 153710                 | PCR fragment size 1000 bp             | PCR fragment size 1300 bp             |
| SNP .205  | 205249                 | GCCTGGGTTTATTTATGG <b>AC</b> GCTAACCG | GCATGGGTTTATTTATGC <b>AG</b> ACTAAACG |
| SNP 2.28  | 2280834                | AGA--AC---GGA                         | AGAG <b>A</b> ACTTGGA                 |
