# Supplementary material for: A Mutation in the FHA Domain of Coprinus cinereus Nbs1 Leads to Spo11-Independent Meiotic Recombination and Chromosome Segregation
Source: PubMed Central journal article supplement (PMC3815056; doi:10.1534/g3.113.007906), 2013-11-01
Supplement: supp_g3.113.007906_TableS6.pdf [file supp_g3.113.007906_TableS6.pdf]

**Table S6 Interference on chromosome 3**

| Genetic interval | Wild type | <i>nbs1-2</i> |
|------------------|-----------|---------------|
| A/B/C            | 0         | 0             |
| B/C/D            | 0         | 3.33*         |
| C/D/E            | 0         | 0             |
| D/E/F            | 0         | 2.32          |
| E/F/G            | 0         | 2.56          |
| F/G/H            | 16.23     | 0             |
| G/H/I            | 0         | 0             |
| H/I/J            | 0         | 0             |
| I/J/K            | 0         | 0             |
| J/K/L            | 0         | 0             |
| K/L/M            | 0         | 0.67          |
| L/M/N            | 0         | 0             |

\*statistically significant,  $p < 0.05$

Interference was calculated as in Malkova et al (2004). Zero indicates complete interference, numbers greater than 1 indicate negative interference, and numbers between zero and one indicate loss of positive interference.
